# Supplementary material
Source: publisher figshare collection journal article supplement (https://frontiersin.figshare.com/ndownloader/files/28216815)
Supplement: Supplementary file [file 28216815]

## Figures and Figure legends

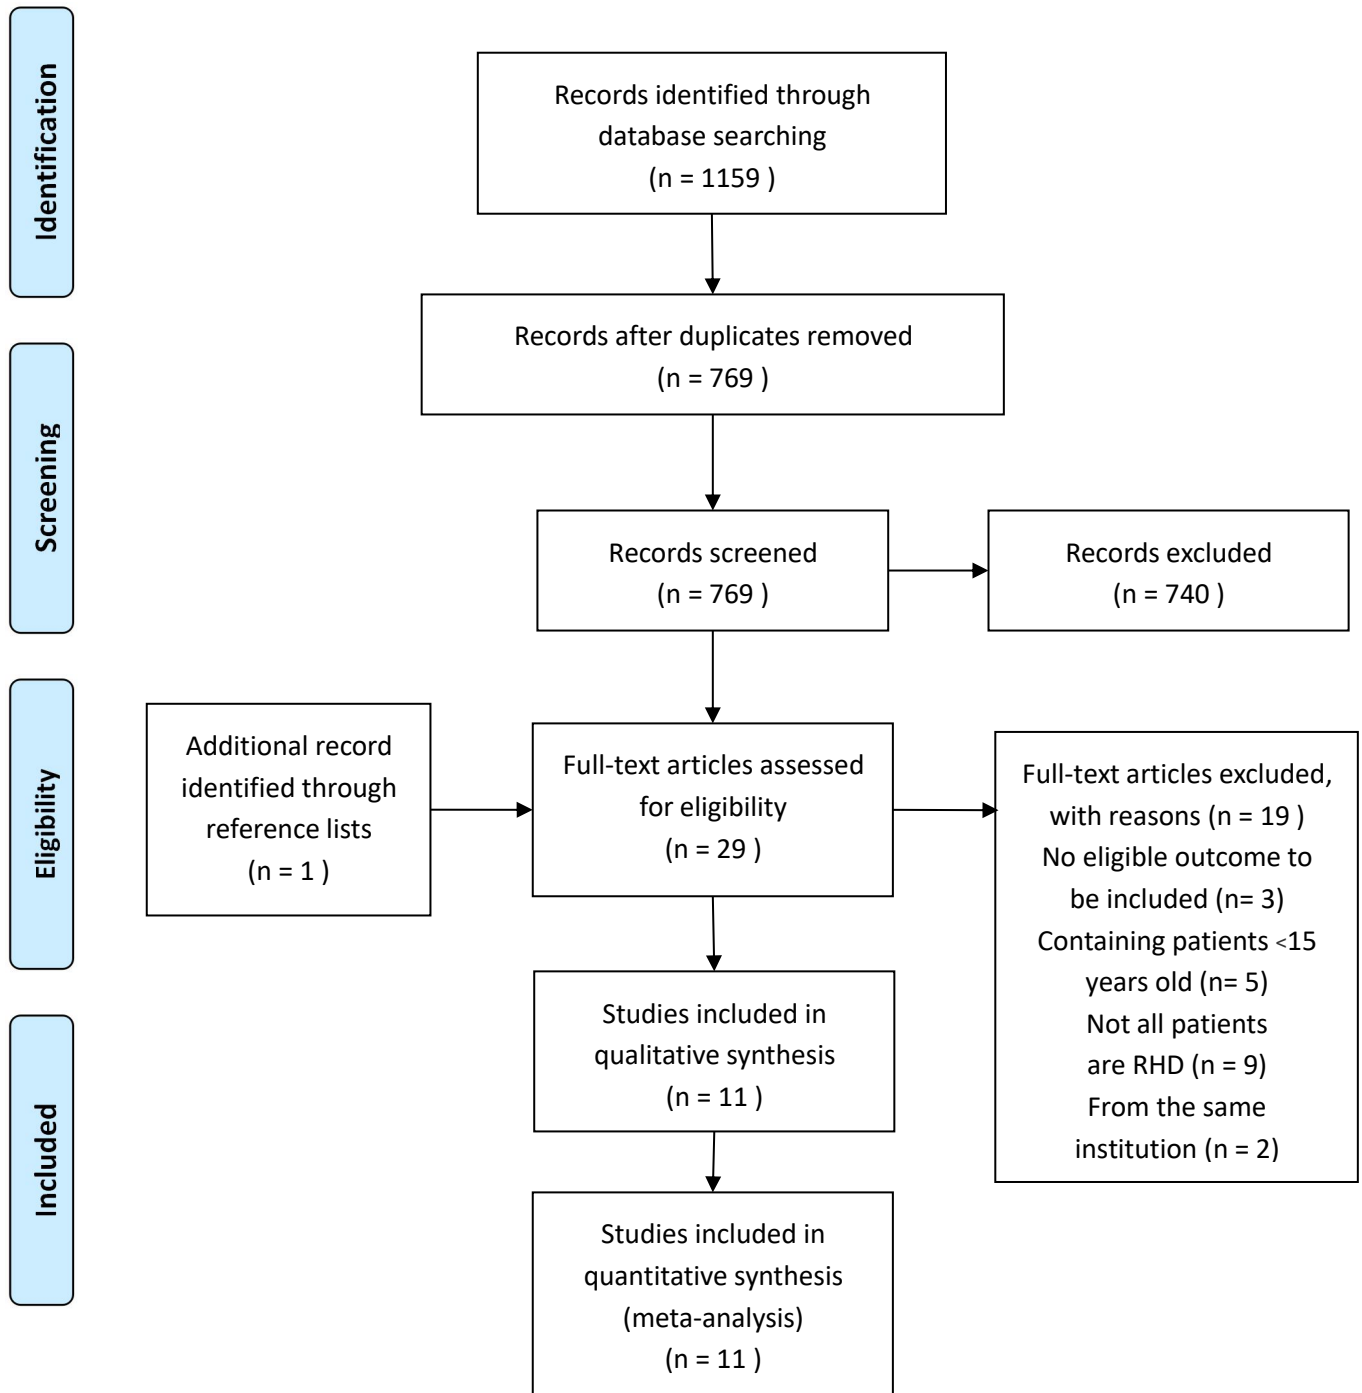

**Supplementary Figure S1.** PRISMA flow diagram for literature search and inclusion

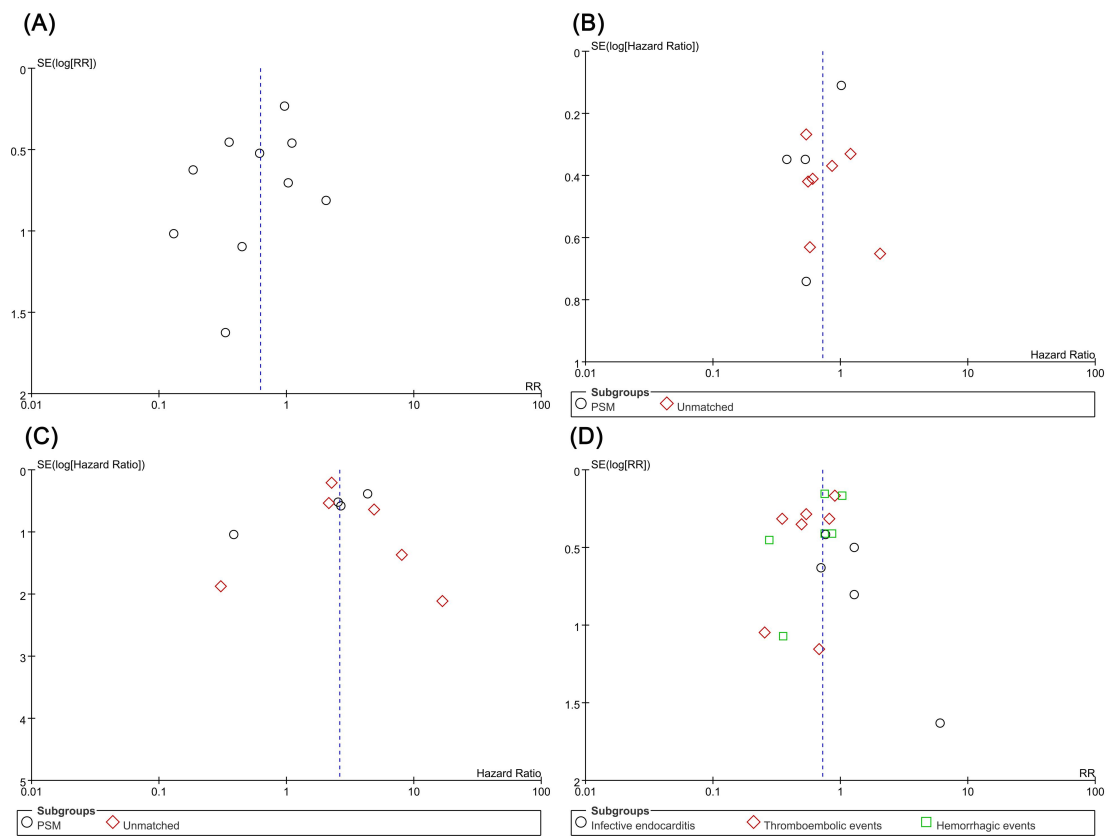

**Supplementary Figure S2.** Funnel plot showing the publication bias. A, Early mortality; B, long-term survival; C, freedom from reoperation; D, infective endocarditis, thromboembolic events and hemorrhagic events.

## Table

**Supplementary Table S1.** Quality assessment of included studies using Newcastle–Ottawa Scale

[illegible]
